# Supplementary material
Source: PubMed Central journal article supplement (PMC6393931)
Supplement: NIHMS986629-supplement.pdf [file NIHMS986629-supplement.pdf]

## Supporting Information

Additional Supporting Information may be found online in the the supporting information tab for this article.

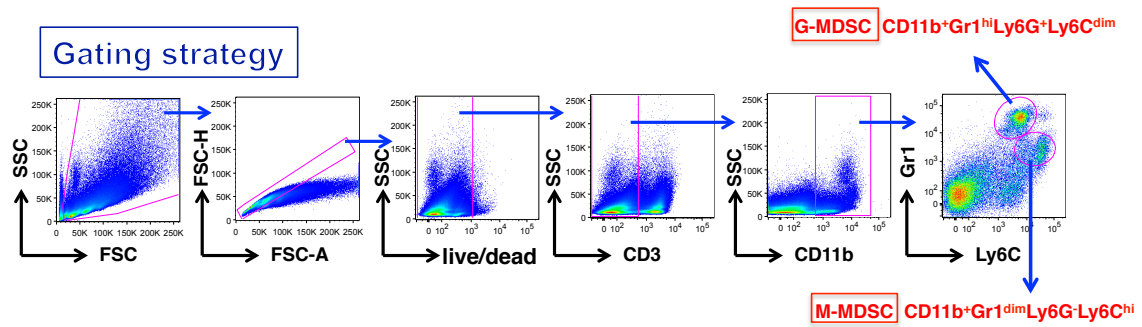

**Figure S1. MDSC gating strategy.**

MDSC - myeloid-derived suppressor cells

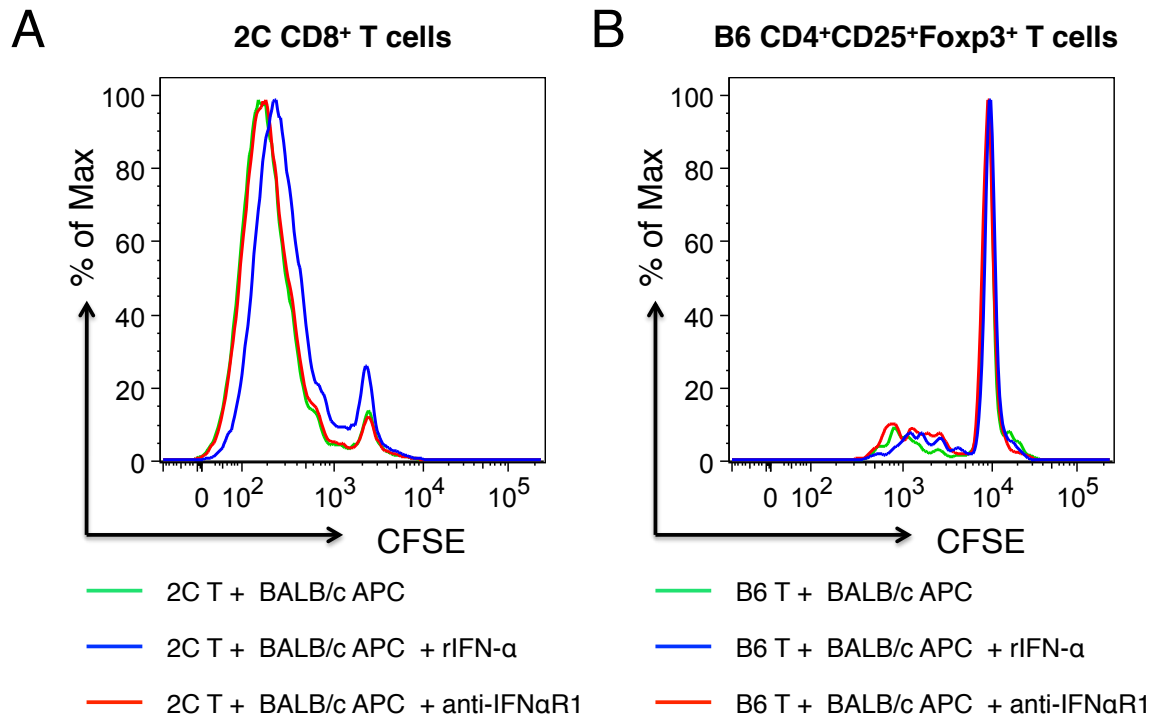

**Figure S 2. Recombinant IFN- $\alpha$  or anti-IFN $\alpha$ R1 does not directly affect BALB/c stimulated 2C T cell proliferation or BALB/c stimulated B6 CD4<sup>+</sup>CD25<sup>+</sup>Foxp3<sup>+</sup> Treg proliferation.** (A) 2C CD8<sup>+</sup> T cell proliferation to BALB/c stimulation was measured by CFSE dilution in MLRs set up as described in Methods. In some cases, rIFN- $\alpha$  (1000 U/ml) or anti-IFN $\alpha$ R1 (20  $\mu$ g/ml) was added to the cultures to determine their direct effects on 2C proliferation. Representative histograms were gated on 2C CD8<sup>+</sup> T cells. (B) B6 CD4<sup>+</sup>CD25<sup>+</sup>Foxp3<sup>+</sup> Treg proliferation to BALB/c stimulation was measured by CFSE dilution in MLRs set up as described in Methods. In some cases, rIFN- $\alpha$  or anti-IFN $\alpha$ R1 was added to the cultures to determine their direct effects on CD4<sup>+</sup>CD25<sup>+</sup>Foxp3<sup>+</sup> Treg proliferation. Representative histograms were gated on CD4<sup>+</sup>CD25<sup>+</sup>Foxp3<sup>+</sup> Tregs.
